# Supplementary material
Source: ML conference proceedings conference paper supplement (https://proceedings.mlr.press/v108/li20a.html)
Supplement: Supplementary file [file li20a-supp.pdf]

# Appendix

## A Useful Lemmas and Facts

**Lemma 7.** [Nesterov, 2004, Theorem 2.1.5]. *If  $f$  is convex and has  $L$ -Lipschitz gradient, then the following inequalities are true*

$$f(\mathbf{x}) - f(\mathbf{y}) \leq \langle \nabla f(\mathbf{y}), \mathbf{x} - \mathbf{y} \rangle + \frac{L}{2} \|\mathbf{x} - \mathbf{y}\|^2 \quad (9a)$$

$$f(\mathbf{x}) - f(\mathbf{y}) \geq \langle \nabla f(\mathbf{y}), \mathbf{x} - \mathbf{y} \rangle + \frac{1}{2L} \|\nabla f(\mathbf{x}) - \nabla f(\mathbf{y})\|^2 \quad (9b)$$

$$\langle \nabla f(\mathbf{x}) - \nabla f(\mathbf{y}), \mathbf{x} - \mathbf{y} \rangle \geq \frac{1}{L} \|\nabla f(\mathbf{x}) - \nabla f(\mathbf{y})\|^2. \quad (9c)$$

Note that inequality (9a) does not require the convexity of  $f$ .

**Lemma 8.** [Nesterov, 2004]. *If  $f$  is  $\mu$ -strongly convex and has  $L$ -Lipschitz gradient, with  $\mathbf{x}^* := \arg \min_{\mathbf{x}} f(\mathbf{x})$ , the following inequalities are true*

$$2\mu(f(\mathbf{x}) - f(\mathbf{x}^*)) \leq \|\nabla f(\mathbf{x})\|^2 \leq 2L(f(\mathbf{x}) - f(\mathbf{x}^*)) \quad (10a)$$

$$\mu \|\mathbf{x} - \mathbf{x}^*\| \leq \|\nabla f(\mathbf{x})\| \leq L \|\mathbf{x} - \mathbf{x}^*\| \quad (10b)$$

$$\frac{\mu}{2} \|\mathbf{x} - \mathbf{x}^*\|^2 \leq f(\mathbf{x}) - f(\mathbf{x}^*) \leq \frac{L}{2} \|\mathbf{x} - \mathbf{x}^*\|^2 \quad (10c)$$

$$\langle \nabla f(\mathbf{x}) - \nabla f(\mathbf{y}), \mathbf{x} - \mathbf{y} \rangle \geq \mu \|\mathbf{x} - \mathbf{y}\|^2. \quad (10d)$$

*Proof.* By definition  $f(\mathbf{x}^*) - f(\mathbf{x}) \geq \langle \nabla f(\mathbf{x}), \mathbf{x}^* - \mathbf{x} \rangle + \frac{\mu}{2} \|\mathbf{x} - \mathbf{x}^*\|^2$ , minimizing over  $\mathbf{x} - \mathbf{x}^*$  on the RHS results in (10a). Inequality (10b) follows from [Nesterov, 2004, Theorem 2.1.9] and the fact  $\nabla f(\mathbf{x}^*) = 0$ . Inequality (10c) is from [Nesterov, 2004, Theorem 2.1.7]; and, (10d) is from [Nesterov, 2004, Theorem 2.1.9]  $\square$

### Proof of Lemma 3:

*Proof.* If  $t_1 \neq t_2$ ,  $N_{t_1:t}$  and  $N_{t_2:t}$  are disjoint by definition, since the most recent calculated snapshot gradient can only appear at either  $t_1$  or  $t_2$ . Since  $\{B_t\}$  are i.i.d., one can find the probability of  $N_{t_1:t}$  as

$$\mathbb{P}(N_{t_1:t}) = \begin{cases} \frac{1}{m} \left(1 - \frac{1}{m}\right)^{t-t_1} & \text{if } 1 \leq t_1 \leq t \\ \left(1 - \frac{1}{m}\right)^t & \text{if } t_1 = 0. \end{cases} \quad (11)$$

Hence one can verify that

$$\sum_{t_1=0}^t \mathbb{P}(N_{t_1:t}) = \left(1 - \frac{1}{m}\right)^t + \sum_{t_1=1}^{t-1} \frac{1}{m} \left(1 - \frac{1}{m}\right)^{t-t_1} + \frac{1}{m} \left(1 - \frac{1}{m}\right)^t + \frac{1}{m} \frac{1 - \frac{1}{m} - \left(1 - \frac{1}{m}\right)^t}{1 - \left(1 - \frac{1}{m}\right)} + \frac{1}{m} = 1$$

which completes the proof.  $\square$

## B Technical Proofs in Section 3.1

### B.1 Proof of Lemma 4

The following lemmas are needed for the proof.

**Lemma 9.** *The following equation is true for  $t > t_1$*

$$\mathbb{E}[\|\nabla F(\mathbf{x}_t) - \mathbf{v}_t\|^2 | N_{t_1:t}] = \sum_{\tau=t_1+1}^t \mathbb{E}[\|\mathbf{v}_\tau - \mathbf{v}_{\tau-1}\|^2 | N_{t_1:t}] - \sum_{\tau=t_1+1}^t \mathbb{E}[\|\nabla F(\mathbf{x}_\tau) - \nabla F(\mathbf{x}_{\tau-1})\|^2 | N_{t_1:t}].$$

*Proof.* Consider that

$$\begin{aligned}
 & \mathbb{E}[\|\nabla F(\mathbf{x}_t) - \mathbf{v}_t\|^2 | \mathcal{F}_{t-1}, N_{t_1:t}] \\
 &= \mathbb{E}[\|\nabla F(\mathbf{x}_t) - \nabla F(\mathbf{x}_{t-1}) + \nabla F(\mathbf{x}_{t-1}) - \mathbf{v}_{t-1} + \mathbf{v}_{t-1} - \mathbf{v}_t\|^2 | \mathcal{F}_{t-1}, N_{t_1:t}] \\
 &= \|\nabla F(\mathbf{x}_t) - \nabla F(\mathbf{x}_{t-1})\|^2 + \mathbb{E}[\|\mathbf{v}_t - \mathbf{v}_{t-1}\|^2 | \mathcal{F}_{t-1}, N_{t_1:t}] + \|\nabla F(\mathbf{x}_{t-1}) - \mathbf{v}_{t-1}\|^2 \\
 &\quad + 2\langle \nabla F(\mathbf{x}_t) - \nabla F(\mathbf{x}_{t-1}), \nabla F(\mathbf{x}_{t-1}) - \mathbf{v}_{t-1} \rangle \\
 &\quad + 2\mathbb{E}[\langle \nabla F(\mathbf{x}_t) - \nabla F(\mathbf{x}_{t-1}), \mathbf{v}_{t-1} - \mathbf{v}_t \rangle | \mathcal{F}_{t-1}, N_{t_1:t}] \\
 &\quad + 2\mathbb{E}[\langle \nabla F(\mathbf{x}_{t-1}) - \mathbf{v}_{t-1}, \mathbf{v}_{t-1} - \mathbf{v}_t \rangle | \mathcal{F}_{t-1}, N_{t_1:t}] \\
 &= \mathbb{E}[\|\mathbf{v}_t - \mathbf{v}_{t-1}\|^2 | \mathcal{F}_{t-1}, N_{t_1:t}] - \|\nabla F(\mathbf{x}_t) - \nabla F(\mathbf{x}_{t-1})\|^2 + \|\nabla F(\mathbf{x}_{t-1}) - \mathbf{v}_{t-1}\|^2
 \end{aligned} \tag{12}$$

where the last equation is because  $\mathbb{E}[\mathbf{v}_t - \mathbf{v}_{t-1} | \mathcal{F}_{t-1}, N_{t_1:t}] = \nabla F(\mathbf{x}_t) - \nabla F(\mathbf{x}_{t-1})$ . We can expand  $\mathbb{E}[\|\nabla F(\mathbf{x}_{t-1}) - \mathbf{v}_{t-1}\|^2 | \mathcal{F}_{t-2}, N_{t_1:t}]$  using the same argument. Note that we have  $\nabla F(\mathbf{x}_{t_1}) = \mathbf{v}_{t_1}$ , which suggests

$$\mathbb{E}[\|\nabla F(\mathbf{x}_{t_1+1}) - \mathbf{v}_{t_1+1}\|^2 | \mathcal{F}_{t_1}, N_{t_1:t}] = \mathbb{E}[\|\mathbf{v}_{t_1+1} - \mathbf{v}_{t_1}\|^2 | \mathcal{F}_{t_1}, N_{t_1:t}] - \|\nabla F(\mathbf{x}_{t_1+1}) - \nabla F(\mathbf{x}_{t_1})\|^2.$$

Then taking expectation w.r.t.  $\mathcal{F}_{t-1}$  and expanding  $\mathbb{E}[\|\nabla F(\mathbf{x}_{t-1}) - \mathbf{v}_{t-1}\|^2]$  in (12), the proof is completed.  $\square$

**Proof of Lemma 4:** The implication of this Lemma 3 is that *law of total probability* [Gubner, 2006] holds. Specifically, for a random variable  $C_t$  that happens in iteration  $t$ , the following equation holds

$$\mathbb{E}[C_t] = \sum_{t_1=0}^t \mathbb{E}[C_t | N_{t_1:t}] \mathbb{P}\{N_{t_1:t}\}. \tag{13}$$

Now we turn to prove Lemma 4. To start with, consider that when  $t_1 \neq t$

$$\begin{aligned}
 & \mathbb{E}[\|\mathbf{v}_t\|^2 | \mathcal{F}_{t-1}, N_{t_1:t}] = \mathbb{E}[\|\mathbf{v}_t - \mathbf{v}_{t-1} + \mathbf{v}_{t-1}\|^2 | \mathcal{F}_{t-1}, N_{t_1:t}] \\
 &= \|\mathbf{v}_{t-1}\|^2 + \mathbb{E}[\|\mathbf{v}_t - \mathbf{v}_{t-1}\|^2 | \mathcal{F}_{t-1}, N_{t_1:t}] + 2\mathbb{E}[\langle \mathbf{v}_{t-1}, \mathbf{v}_t - \mathbf{v}_{t-1} \rangle | \mathcal{F}_{t-1}, N_{t_1:t}] \\
 &\stackrel{(a)}{=} \|\mathbf{v}_{t-1}\|^2 + \mathbb{E}\left[\|\mathbf{v}_t - \mathbf{v}_{t-1}\|^2 + \frac{2}{\eta} \langle \mathbf{x}_{t-1} - \mathbf{x}_t, \nabla f_{i_t}(\mathbf{x}_t) - \nabla f_{i_t}(\mathbf{x}_{t-1}) \rangle \middle| \mathcal{F}_{t-1}, N_{t_1:t}\right] \\
 &\stackrel{(b)}{\leq} \|\mathbf{v}_{t-1}\|^2 + \mathbb{E}\left[\|\mathbf{v}_t - \mathbf{v}_{t-1}\|^2 - \frac{2}{\eta L} \|\nabla f_{i_t}(\mathbf{x}_t) - \nabla f_{i_t}(\mathbf{x}_{t-1})\|^2 \middle| \mathcal{F}_{t-1}, N_{t_1:t}\right] \\
 &= \|\mathbf{v}_{t-1}\|^2 + \mathbb{E}\left[\|\mathbf{v}_t - \mathbf{v}_{t-1}\|^2 - \frac{2}{\eta L} \|\mathbf{v}_t - \mathbf{v}_{t-1}\|^2 \middle| \mathcal{F}_{t-1}, N_{t_1:t}\right] \\
 &= \|\mathbf{v}_{t-1}\|^2 + \mathbb{E}\left[\left(1 - \frac{2}{\eta L}\right) \|\mathbf{v}_t - \mathbf{v}_{t-1}\|^2 \middle| \mathcal{F}_{t-1}, N_{t_1:t}\right]
 \end{aligned}$$

where (a) follows from (2) and the update  $\mathbf{x}_t = \mathbf{x}_{t-1} - \eta \mathbf{v}_{t-1}$ ; and (b) is the result of (9c). Then by choosing  $\eta$  such that  $1 - \frac{2}{\eta L} < 0$ , i.e.,  $\eta < 2/L$ , we have

$$\mathbb{E}[\|\mathbf{v}_t - \mathbf{v}_{t-1}\|^2 | \mathcal{F}_{t-1}, N_{t_1:t}] \leq \frac{\eta L}{2 - \eta L} \left( \|\mathbf{v}_{t-1}\|^2 - \mathbb{E}[\|\mathbf{v}_t\|^2 | \mathcal{F}_{t-1}, N_{t_1:t}] \right). \tag{14}$$

Plugging (14) into Lemma 9, we have

$$\begin{aligned}
 \mathbb{E}[\|\nabla F(\mathbf{x}_t) - \mathbf{v}_t\|^2 | \mathcal{F}_{t_1-1}, N_{t_1:t}] &\leq \sum_{\tau=t_1+1}^t \mathbb{E}[\|\mathbf{v}_\tau - \mathbf{v}_{\tau-1}\|^2 | \mathcal{F}_{t_1-1}, N_{t_1:t}] \\
 &= \frac{\eta L}{2 - \eta L} \mathbb{E}[\|\mathbf{v}_{t_1}\|^2 | \mathcal{F}_{t_1-1}, N_{t_1:t}] = \frac{\eta L}{2 - \eta L} \|\nabla F(\mathbf{x}_{t_1})\|^2
 \end{aligned}$$

where the last equation is because conditioning on  $N_{t_1:t}$ ,  $\mathbf{v}_{t_1} = \nabla F(\mathbf{x}_{t_1})$ . Note that when  $t_1 = t$ , this inequality automatically holds since the LHS equals to 0. Because the randomness of  $\nabla F(\mathbf{x}_{t_1})$  is irrelevant to  $B_{t_1}$  (thus  $N_{t_1:t}$ ), after taking expectation w.r.t.  $\mathcal{F}_{t_1-1}$ , we have

$$\mathbb{E}[\|\nabla F(\mathbf{x}_t) - \mathbf{v}_t\|^2 | N_{t_1:t}] \leq \frac{\eta L}{2 - \eta L} \mathbb{E}[\|\nabla F(\mathbf{x}_{t_1})\|^2 | N_{t_1:t}] = \frac{\eta L}{2 - \eta L} \mathbb{E}[\|\nabla F(\mathbf{x}_{t_1})\|^2]$$

which proves the first part of Lemma 4.

For the second part of Lemma 4, by calculating the probability of  $N_{t_1:t}$  as in (11), we have

$$\begin{aligned}
 \mathbb{E}[\|\nabla F(\mathbf{x}_t) - \mathbf{v}_t\|^2] &\stackrel{(c)}{=} \sum_{t_1=0}^{t-1} \mathbb{E}[\|\nabla F(\mathbf{x}_t) - \mathbf{v}_t\|^2 | N_{t_1:t}] \mathbb{P}\{N_{t_1:t}\} \\
 &\leq \sum_{t_1=0}^{t-1} \frac{\eta L}{2 - \eta L} \mathbb{E}[\|\nabla F(\mathbf{x}_{t_1})\|^2] \mathbb{P}\{N_{t_1:t}\} \\
 &= \frac{\eta L}{2 - \eta L} \left[ \frac{1}{m} \sum_{\tau=1}^{t-1} \left(1 - \frac{1}{m}\right)^{t-\tau} \mathbb{E}[\|\nabla F(\mathbf{x}_\tau)\|^2] + \left(1 - \frac{1}{m}\right)^t \|\nabla F(\mathbf{x}_0)\|^2 \right]
 \end{aligned}$$

where (c) uses (13), and  $\mathbb{E}[\|\nabla F(\mathbf{x}_t) - \mathbf{v}_t\|^2 | N_{t:t}] = 0$ . The proof is thus completed.

## B.2 Proof of Theorem 1

Following Assumption 1, we have

$$\begin{aligned}
 F(\mathbf{x}_{t+1}) - F(\mathbf{x}_t) &\leq \langle \nabla F(\mathbf{x}_t), \mathbf{x}_{t+1} - \mathbf{x}_t \rangle + \frac{L}{2} \|\mathbf{x}_{t+1} - \mathbf{x}_t\|^2 \\
 &= -\eta \langle \nabla F(\mathbf{x}_t), \mathbf{v}_t \rangle + \frac{\eta^2 L}{2} \|\mathbf{v}_t\|^2 \\
 &= -\frac{\eta}{2} [\|\nabla F(\mathbf{x}_t)\|^2 + \|\mathbf{v}_t\|^2 - \|\nabla F(\mathbf{x}_t) - \mathbf{v}_t\|^2] + \frac{\eta^2 L}{2} \|\mathbf{v}_t\|^2
 \end{aligned} \tag{15}$$

where the last equation is because  $\langle \mathbf{a}, \mathbf{b} \rangle = \frac{1}{2} [\|\mathbf{a}\|^2 + \|\mathbf{b}\|^2 - \|\mathbf{a} - \mathbf{b}\|^2]$ . Rearranging the terms, we arrive at

$$\begin{aligned}
 \|\nabla F(\mathbf{x}_t)\|^2 &\leq \frac{2[F(\mathbf{x}_t) - F(\mathbf{x}_{t+1})]}{\eta} + \|\nabla F(\mathbf{x}_t) - \mathbf{v}_t\|^2 - (1 - \eta L) \|\mathbf{v}_t\|^2 \\
 &\leq \frac{2[F(\mathbf{x}_t) - F(\mathbf{x}_{t+1})]}{\eta} + \|\nabla F(\mathbf{x}_t) - \mathbf{v}_t\|^2
 \end{aligned}$$

where the last inequality holds since  $\eta < 1/L$ . Taking expectation and summing over  $t = 1, \dots, T$ , we have

$$\begin{aligned}
 \sum_{t=1}^T \mathbb{E}[\|\nabla F(\mathbf{x}_t)\|^2] &\leq \frac{2[F(\mathbf{x}_1) - F(\mathbf{x}_{T+1})]}{\eta} + \sum_{t=1}^T \mathbb{E}[\|\nabla F(\mathbf{x}_t) - \mathbf{v}_t\|^2] \\
 &\stackrel{(a)}{\leq} \frac{2[F(\mathbf{x}_1) - F(\mathbf{x}_{T+1})]}{\eta} + \frac{\eta L}{2 - \eta L} \frac{1}{m} \sum_{t=1}^T \sum_{\tau=1}^{t-1} \left(1 - \frac{1}{m}\right)^{t-\tau} \mathbb{E}[\|\nabla F(\mathbf{x}_\tau)\|^2] \\
 &\quad + \frac{\eta L}{2 - \eta L} \sum_{t=1}^T \left(1 - \frac{1}{m}\right)^t \|\nabla F(\mathbf{x}_0)\|^2 \\
 &\stackrel{(b)}{\leq} \frac{2[F(\mathbf{x}_1) - F(\mathbf{x}_{T+1})]}{\eta} + \frac{\eta L}{2 - \eta L} \frac{1}{m} \sum_{t=1}^{T-1} \left[ \sum_{\tau=1}^{T-t} \left(1 - \frac{1}{m}\right)^\tau \right] \mathbb{E}[\|\nabla F(\mathbf{x}_t)\|^2] \\
 &\quad + \frac{m\eta L}{2 - \eta L} \|\nabla F(\mathbf{x}_0)\|^2 \\
 &\stackrel{(c)}{\leq} \frac{2[F(\mathbf{x}_1) - F(\mathbf{x}_{T+1})]}{\eta} + \frac{\eta L}{2 - \eta L} \sum_{t=1}^T \mathbb{E}[\|\nabla F(\mathbf{x}_t)\|^2] + \frac{m\eta L}{2 - \eta L} \|\nabla F(\mathbf{x}_0)\|^2
 \end{aligned}$$

where (a) is the result of Lemma 4; (b) is by changing the order of summation, and  $\sum_{t=1}^T (1 - \frac{1}{m})^t \leq m$ ; and, (c) is again by  $\sum_{\tau=1}^{T-t} (1 - \frac{1}{m})^\tau \leq m$ . Rearranging the terms and dividing both sides by  $T$ , we have

$$\begin{aligned} \left(1 - \frac{\eta L}{2 - \eta L}\right) \frac{1}{T} \sum_{t=1}^T \mathbb{E}[\|\nabla F(\mathbf{x}_t)\|^2] &\leq \frac{2[F(\mathbf{x}_1) - F(\mathbf{x}_{T+1})]}{\eta T} + \frac{\eta L}{2 - \eta L} \frac{m}{T} \|\nabla F(\mathbf{x}_0)\|^2 \\ &\leq \frac{2[F(\mathbf{x}_1) - F(\mathbf{x}^*)]}{\eta T} + \frac{\eta L}{2 - \eta L} \frac{m}{T} \|\nabla F(\mathbf{x}_0)\|^2. \end{aligned} \quad (16)$$

Finally, since  $\mathbf{v}_0 = \nabla F(\mathbf{x}_0)$ , we have

$$\begin{aligned} F(\mathbf{x}_1) - F(\mathbf{x}_0) &\leq \langle \nabla F(\mathbf{x}_0), \mathbf{x}_1 - \mathbf{x}_0 \rangle + \frac{L}{2} \|\mathbf{x}_1 - \mathbf{x}_0\|^2 \\ &= -\eta \|\nabla F(\mathbf{x}_0)\|^2 + \frac{\eta^2 L}{2} \|\nabla F(\mathbf{x}_0)\|^2 \leq 0 \end{aligned} \quad (17)$$

where the last inequality follows from  $\eta < 1/L$ . Hence we have  $F(\mathbf{x}_1) \leq F(\mathbf{x}_0)$ , which is applied to (16) to have

$$\left(1 - \frac{\eta L}{2 - \eta L}\right) \frac{1}{T} \sum_{t=1}^T \mathbb{E}[\|\nabla F(\mathbf{x}_t)\|^2] \leq \frac{2[F(\mathbf{x}_0) - F(\mathbf{x}^*)]}{\eta T} + \frac{\eta L}{2 - \eta L} \frac{m}{T} \|\nabla F(\mathbf{x}_0)\|^2.$$

Now if we choose  $\eta < 1/L$  such that  $1 - \frac{\eta L}{2 - \eta L} \geq C_\eta$  with  $C_\eta$  being a positive constant, then we have

$$\mathbb{E}[\|\nabla F(\mathbf{x}_a)\|^2] = \frac{1}{T} \sum_{t=1}^T \mathbb{E}[\|\nabla F(\mathbf{x}_t)\|^2] = \mathcal{O}\left(\frac{F(\mathbf{x}_0) - F(\mathbf{x}^*)}{\eta T C_\eta} + \frac{m \eta L \|\nabla F(\mathbf{x}_0)\|^2}{T C_\eta}\right).$$

### B.3 Proof of Corollaries 1 and 2

From Theorem 1, it is clear that upon choosing  $\eta = \mathcal{O}(1/L)$ , we have  $\mathbb{E}[\|\nabla F(\mathbf{x}_a)\|^2] = \mathcal{O}(m/T)$ . This means that  $T = \mathcal{O}(m/\epsilon)$  iterations are needed to guarantee  $\mathbb{E}[\|\nabla F(\mathbf{x}_a)\|^2] = \epsilon$ .

Per iteration requires  $\frac{n}{m} + 2(1 - \frac{1}{m})$  IFO calls in expectation. And  $n$  IFO calls are required when computing  $\mathbf{v}_0$ .

Combining these facts together, we have that  $\mathbb{E}[\|\nabla F(\mathbf{x}_a)\|^2] = \mathcal{O}(\sqrt{n}/T)$  if  $m = \Theta(\sqrt{n})$ . And the IFO complexity is  $n + [\frac{n}{m} + 2(1 - \frac{1}{m})]T = \mathcal{O}(n + n/\epsilon)$ .

Similarly, if  $m = \Theta(n)$ , we have  $\mathbb{E}[\|\nabla F(\mathbf{x}_a)\|^2] = \mathcal{O}(n/T)$ . And the IFO complexity in this case becomes  $\mathcal{O}(n + n/\epsilon)$ .

### B.4 Proof of Corollary 3

From Theorem 1, it is clear that with a large  $m$ , choosing  $\eta = \mathcal{O}(1/\sqrt{m}L)$  leads to  $C_\eta \geq 0.5$ . Thus we have  $\mathbb{E}[\|\nabla F(\mathbf{x}_a)\|^2] = \mathcal{O}(\sqrt{m}/T)$ . This translates to the need of  $T = \mathcal{O}(\sqrt{m}/\epsilon)$  iterations to guarantee  $\mathbb{E}[\|\nabla F(\mathbf{x}_a)\|^2] = \epsilon$ .

Choosing  $m = \Theta(n)$ , we have  $\mathbb{E}[\|\nabla F(\mathbf{x}_a)\|^2] = \mathcal{O}(\sqrt{n}/T)$ . And the number of IFO calls is  $n + [\frac{n}{m} + 2(1 - \frac{1}{m})]T = \mathcal{O}(n + \sqrt{n}/\epsilon)$ .

## C Technical Proofs in Section 3.2

Using the Bernoulli random variable  $B_t$  introduced in (4), L2S (Alg. 2) can be rewritten in an equivalent form as Alg. 4.

**Algorithm 4** L2S Equivalent Form

- 1: **Initialize:**  $\mathbf{x}_0, \eta, m, T$
- 2: Compute  $\mathbf{v}_0 = \nabla F(\mathbf{x}_0)$
- 3:  $\mathbf{x}_1 = \mathbf{x}_0 - \eta \mathbf{v}_0$
- 4: **for**  $t = 1, 2, \dots, T$  **do**
- 5:     Randomly generate  $B_t$ :  $B_t = 1$  w.p.  $\frac{1}{m}$ , and  $B_t = 0$  w.p.  $1 - \frac{1}{m}$
- 6:     **if**  $B_t = 1$  **then,**
- 7:          $\mathbf{v}_t = \nabla F(\mathbf{x}_t)$
- 8:     **else**
- 9:          $\mathbf{v}_t = \nabla f_{i_t}(\mathbf{x}_t) - \nabla f_{i_t}(\mathbf{x}_{t-1}) + \mathbf{v}_{t-1}$
- 10:    **end if**
- 11:     $\mathbf{x}_{t+1} = \mathbf{x}_t - \eta \mathbf{v}_t$
- 12: **end for**
- 13: **Output:** randomly chosen from  $\{\mathbf{x}_t\}_{t=1}^T$

Recall that a known  $N_{t_1:t}$  is equivalent to  $B_{t_1} = 1, B_{t_1+1} = 0, \dots, B_t = 0$ . Now we are ready to prove Lemma 5.

**C.1 Proof of Lemma 5**

It can be seen that Lemma 9 still holds for nonconvex problems, thus we have

$$\begin{aligned}
 \mathbb{E}[\|\nabla F(\mathbf{x}_t) - \mathbf{v}_t\|^2 | N_{t_1:t}] &\leq \sum_{\tau=t_1+1}^t \mathbb{E}[\|\mathbf{v}_\tau - \mathbf{v}_{\tau-1}\|^2 | N_{t_1:t}] \\
 &= \sum_{\tau=t_1+1}^t \mathbb{E}[\|\nabla f_{i_\tau}(\mathbf{x}_\tau) - \nabla f_{i_\tau}(\mathbf{x}_{\tau-1})\|^2 | N_{t_1:t}] \\
 &\leq \eta^2 L^2 \sum_{\tau=t_1+1}^t \mathbb{E}[\|\mathbf{v}_{\tau-1}\|^2 | N_{t_1:t}] = \eta^2 L^2 \sum_{\tau=t_1}^{t-1} \mathbb{E}[\|\mathbf{v}_\tau\|^2 | N_{t_1:t}] \tag{18}
 \end{aligned}$$

where the last inequality follows from Assumption 1 and  $\mathbf{x}_\tau = \mathbf{x}_{\tau-1} - \eta \mathbf{v}_{\tau-1}$ . The first part of this lemma is thus proved. Next, we have

$$\begin{aligned}
 &\mathbb{E}[\|\nabla F(\mathbf{x}_t) - \mathbf{v}_t\|^2] \stackrel{(a)}{=} \sum_{t_1=0}^{t-1} \mathbb{E}[\|\nabla F(\mathbf{x}_t) - \mathbf{v}_t\|^2 | N_{t_1:t}] \mathbb{P}\{N_{t_1:t}\} \\
 &\stackrel{(b)}{\leq} \eta^2 L^2 \sum_{t_1=0}^{t-1} \sum_{\tau=t_1}^{t-1} \mathbb{E}[\|\mathbf{v}_\tau\|^2 | N_{t_1:t}] \mathbb{P}\{N_{t_1:t}\} \stackrel{(c)}{=} \eta^2 L^2 \sum_{\tau=0}^{t-1} \left[ \sum_{t_1=0}^{\tau} \mathbb{E}[\|\mathbf{v}_\tau\|^2 | N_{t_1:t}] \mathbb{P}\{N_{t_1:t}\} \right] \\
 &\stackrel{(d)}{=} \eta^2 L^2 \sum_{\tau=0}^{t-1} \left[ \mathbb{E}[\|\mathbf{v}_\tau\|^2] - \sum_{t_1=\tau+1}^t \mathbb{E}[\|\mathbf{v}_\tau\|^2 | N_{t_1:t}] \mathbb{P}\{N_{t_1:t}\} \right] \\
 &\stackrel{(e)}{=} \eta^2 L^2 \sum_{\tau=0}^{t-1} \left[ \mathbb{E}[\|\mathbf{v}_\tau\|^2] - \sum_{t_1=\tau+1}^t \mathbb{E}[\|\mathbf{v}_\tau\|^2] \mathbb{P}\{N_{t_1:t}\} \right] \\
 &= \eta^2 L^2 \sum_{\tau=0}^{t-1} \left[ \sum_{t_1=0}^{\tau} \mathbb{P}\{N_{t_1:t}\} \right] \mathbb{E}[\|\mathbf{v}_\tau\|^2] = \eta^2 L^2 \sum_{\tau=0}^{t-1} \left(1 - \frac{1}{m}\right)^{t-\tau} \mathbb{E}[\|\mathbf{v}_\tau\|^2]
 \end{aligned}$$

where (a) is by Lemma 3 (or law of total probability) and  $\mathbb{E}[\|\nabla F(\mathbf{x}_t) - \mathbf{v}_t\|^2 | N_{t:t}] = 0$ ; (b) is obtained by plugging (18) in; (c) is established by changing the order of summation; (d) is again by Lemma 3 (or law of total probability); and (e) is because of the independence of  $\mathbf{v}_\tau$  and  $N_{t_1:t}$  when  $t_1 > \tau$ , that is,  $\mathbb{E}[\|\mathbf{v}_\tau\|^2 | N_{t_1:t}] = \mathbb{E}[\|\mathbf{v}_\tau\|^2 | B_{t_1} = 1, B_{t_1+1} = 0, \dots, B_t = 0] = \mathbb{E}[\|\mathbf{v}_\tau\|^2]$ . To be more precise, given  $t_1 > \tau$ , the randomness of  $\mathbf{v}_\tau$  comes from  $B_1, B_2, \dots, B_\tau$  and  $i_1, i_2, \dots, i_\tau$ , thus is independent with  $B_{t_1}, B_{t_1+1}, \dots, B_t$ .

## C.2 Proof of Theorem 2

Following the same steps of (15) in Theorem 1, we have

$$\|\nabla F(\mathbf{x}_t)\|^2 \leq \frac{2[F(\mathbf{x}_t) - F(\mathbf{x}_{t+1})]}{\eta} + \|\nabla F(\mathbf{x}_t) - \mathbf{v}_t\|^2 - (1 - \eta L)\|\mathbf{v}_t\|^2.$$

Taking expectation and summing over  $t$ , we have

$$\begin{aligned} \sum_{t=1}^T \mathbb{E}[\|\nabla F(\mathbf{x}_t)\|^2] &\leq \frac{2[F(\mathbf{x}_1) - F(\mathbf{x}^*)]}{\eta} + \sum_{t=1}^T \mathbb{E}[\|\nabla F(\mathbf{x}_t) - \mathbf{v}_t\|^2] - (1 - \eta L) \sum_{t=1}^T \mathbb{E}[\|\mathbf{v}_t\|^2] \\ &\stackrel{(a)}{\leq} \frac{2[F(\mathbf{x}_1) - F(\mathbf{x}^*)]}{\eta} + \eta^2 L^2 \sum_{t=1}^T \sum_{\tau=0}^{t-1} \left(1 - \frac{1}{m}\right)^{t-\tau} \mathbb{E}[\|\mathbf{v}_\tau\|^2] - (1 - \eta L) \sum_{t=1}^T \mathbb{E}[\|\mathbf{v}_t\|^2] \\ &\stackrel{(b)}{\leq} \frac{2[F(\mathbf{x}_1) - F(\mathbf{x}^*)]}{\eta} + \eta^2 L^2 \sum_{t=1}^T \sum_{\tau=0}^{t-1} \left(1 - \frac{1}{m}\right)^{t-\tau} \mathbb{E}[\|\mathbf{v}_\tau\|^2] - (1 - \eta L) \sum_{t=1}^{T-1} \mathbb{E}[\|\mathbf{v}_t\|^2] \\ &\stackrel{(c)}{\leq} \frac{2[F(\mathbf{x}_1) - F(\mathbf{x}^*)]}{\eta} + m\eta^2 L^2 \sum_{t=0}^{T-1} \mathbb{E}[\|\mathbf{v}_t\|^2] - (1 - \eta L) \sum_{t=1}^{T-1} \mathbb{E}[\|\mathbf{v}_t\|^2] \\ &= \frac{2[F(\mathbf{x}_1) - F(\mathbf{x}^*)]}{\eta} + m\eta^2 L^2 \|\mathbf{v}_0\|^2 + (m\eta^2 L^2 + \eta L - 1) \sum_{t=1}^{T-1} \mathbb{E}[\|\mathbf{v}_t\|^2] \end{aligned} \quad (19)$$

where (a) is by Lemma 5; (b) holds when  $1 - \eta L \geq 0$ ; and (c) is by exchanging the order of summation and  $\sum_{t=1}^{T-1} (1 - \frac{1}{m})^t \leq m$ . Upon choosing  $\eta$  such that  $m\eta^2 L^2 + \eta L - 1 \leq 0$ , i.e.,  $\eta \in (0, \frac{\sqrt{4m+1}-1}{2mL}] = \mathcal{O}(\frac{1}{L\sqrt{m}})$ , we can eliminate the last term in (19). Plugging  $m$  in and dividing both sides by  $T$ , we arrive at

$$\begin{aligned} \mathbb{E}[\|\nabla F(\mathbf{x}_a)\|^2] &= \frac{1}{T} \sum_{t=1}^T \mathbb{E}[\|\nabla F(\mathbf{x}_t)\|^2] \leq \frac{2[F(\mathbf{x}_1) - F(\mathbf{x}^*)]}{\eta T} + \frac{m\eta^2 L^2}{T} \|\nabla F(\mathbf{x}_0)\|^2 \\ &\stackrel{(d)}{\leq} \frac{2[F(\mathbf{x}_0) - F(\mathbf{x}^*)]}{\eta T} + \frac{m\eta^2 L^2}{T} \|\nabla F(\mathbf{x}_0)\|^2 \\ &= \mathcal{O}\left(\frac{L\sqrt{m}[F(\mathbf{x}_0) - F(\mathbf{x}^*)]}{T} + \frac{\|\nabla F(\mathbf{x}_0)\|^2}{T}\right) \end{aligned}$$

where (d) is because  $F(\mathbf{x}_0) \geq F(\mathbf{x}_1)$  when  $\eta \leq 2/L$ , which we have already seen from (17). The proof is thus completed.

## C.3 Proof of Corollary 5

From Theorem 2, choosing  $\eta = \mathcal{O}(1/L\sqrt{m})$ , we have  $\mathbb{E}[\|\nabla F(\mathbf{x}_a)\|^2] = \mathcal{O}(\sqrt{m}/T)$ . This means that  $T = \mathcal{O}(\sqrt{m}/\epsilon)$  iterations are required to ensure  $\mathbb{E}[\|\nabla F(\mathbf{x}_a)\|^2] = \epsilon$ .

Per iteration it takes in expectation  $\frac{n}{m} + 2(1 - \frac{1}{m})$  IFO calls. And  $n$  IFO calls are required for computing  $\mathbf{v}_0$

Hence choosing  $m = \Theta(n)$ , the IFO complexity is  $n + [\frac{n}{m} + 2(1 - \frac{1}{m})]T = \mathcal{O}(n + \sqrt{n}/\epsilon)$ .

## D Technical Proofs in Section 3.3

### D.1 Proof of Lemma 6

We borrow the following lemmas from [Nguyen et al., 2017] and summarize them below.

**Lemma 10.** [Nguyen et al., 2017, Theorem 1a] Suppose that Assumptions 1 - 3 hold. Choosing step size  $\eta \leq 2/L$  in SARAH (Alg. 1), then for a particular inner loop  $s$  and any  $t \geq 1$ , we have

$$\mathbb{E}[\|\mathbf{v}_t^s\|^2] \leq \left[1 - \left(\frac{2}{\eta L} - 1\right)\mu^2\eta^2\right]^t \mathbb{E}[\|\nabla F(\tilde{\mathbf{x}}^{s-1})\|^2].$$

**Lemma 11.** [Nguyen et al., 2017, Theorem 1b] Suppose that Assumptions 1 and 4 hold. Choosing step size  $\eta < 2/(\mu + L)$  in SARAH (Alg. 1), then for a particular inner loop  $s$  and any  $t \geq 1$ , we have

$$\mathbb{E}[\|\mathbf{v}_t^s\|^2] \leq \left[1 - \frac{2\mu L\eta}{\mu + L}\right]^t \mathbb{E}[\|\nabla F(\tilde{\mathbf{x}}^{s-1})\|^2].$$

Now we are ready to prove Lemma 6.

**Case 1: Assumptions 1 – 3 hold.** Following Assumption 1, we have

$$F(\mathbf{x}_{t+1}^s) - F(\mathbf{x}_t^s) \leq -\frac{\eta}{2} \left[ \|\nabla F(\mathbf{x}_t^s)\|^2 + \|\mathbf{v}_t^s\|^2 - \|\nabla F(\mathbf{x}_t^s) - \mathbf{v}_t^s\|^2 \right] + \frac{(\eta)^2 L}{2} \|\mathbf{v}_t^s\|^2. \quad (20)$$

The derivation is exactly the same as (15), so we do not repeat it here. Rearranging the terms and dividing both sides with  $\eta/2$ , we have

$$\begin{aligned} \|\nabla F(\mathbf{x}_t^s)\|^2 &\leq \frac{2[F(\mathbf{x}_t^s) - F(\mathbf{x}_{t+1}^s)]}{\eta} + \|\nabla F(\mathbf{x}_t^s) - \mathbf{v}_t^s\|^2 - (1 - \eta L)\|\mathbf{v}_t^s\|^2 \\ &\stackrel{(a)}{\leq} \frac{2\langle \nabla F(\mathbf{x}_t^s), \mathbf{x}_t^s - \mathbf{x}_{t+1}^s \rangle}{\eta} + \|\nabla F(\mathbf{x}_t^s) - \mathbf{v}_t^s\|^2 - (1 - \eta L)\|\mathbf{v}_t^s\|^2 \\ &\stackrel{(b)}{\leq} \frac{2}{\eta} \left[ \frac{\delta \|\nabla F(\mathbf{x}_t^s)\|^2}{2} + \frac{\|\mathbf{x}_t^s - \mathbf{x}_{t+1}^s\|^2}{2\delta} \right] + \|\nabla F(\mathbf{x}_t^s) - \mathbf{v}_t^s\|^2 - (1 - \eta L)\|\mathbf{v}_t^s\|^2 \end{aligned}$$

where (a) follows from the convexity of  $F$ ; (b) uses Young's inequality with  $\delta > 0$  to be specified later. Since  $\mathbf{x}_{t+1}^s = \mathbf{x}_t^s - \eta\mathbf{v}_t^s$ , rearranging the terms we have

$$\left(1 - \frac{\delta}{\eta}\right) \|\nabla F(\mathbf{x}_t^s)\|^2 \leq \|\nabla F(\mathbf{x}_t^s) - \mathbf{v}_t^s\|^2 - \left(1 - \eta L - \frac{\eta}{\delta}\right) \|\mathbf{v}_t^s\|^2.$$

Choosing  $\delta = 0.5\eta$ , we have

$$\frac{1}{2} \|\nabla F(\mathbf{x}_t^s)\|^2 \leq \|\nabla F(\mathbf{x}_t^s) - \mathbf{v}_t^s\|^2 + (1 + \eta L)\|\mathbf{v}_t^s\|^2. \quad (21)$$

Then, taking expectation w.r.t.  $\mathcal{F}_{t-1}$ , applying Lemma 1 to  $\mathbb{E}[\|\nabla F(\mathbf{x}_t^s) - \mathbf{v}_t^s\|^2]$  and Lemma 10 to  $\mathbb{E}[\|\mathbf{v}_t^s\|^2]$ , with  $t = m$  we have

$$\frac{1}{2} \mathbb{E}[\|\nabla F(\mathbf{x}_m^s)\|^2] \leq \frac{\eta L}{2 - \eta L} \|\nabla F(\tilde{\mathbf{x}}^{s-1})\|^2 + (1 + \eta L) \left[1 - \left(\frac{2}{\eta L} - 1\right) \mu^2 \eta^2\right]^m \mathbb{E}[\|\nabla F(\tilde{\mathbf{x}}^{s-1})\|^2].$$

Multiplying both sides by 2 completes the proof.

**Case 2: Assumptions 1 and 4 hold.** Using exactly same arguments as Case 1 we can arrive at (21). Now applying Lemma 11, we have

$$\begin{aligned} \frac{1}{2} \mathbb{E}[\|\nabla F(\mathbf{x}_m^s)\|^2] &\leq \frac{\eta L}{2 - \eta L} \|\nabla F(\tilde{\mathbf{x}}^{s-1})\|^2 + (1 + \eta L) \left(1 - \frac{2\mu L\eta}{\mu + L}\right)^m \mathbb{E}[\|\nabla F(\tilde{\mathbf{x}}^{s-1})\|^2] \\ &= \frac{\eta L}{2 - \eta L} \|\nabla F(\tilde{\mathbf{x}}^{s-1})\|^2 + (1 + \eta L) \left(1 - \frac{2L\eta}{1 + \kappa}\right)^m \mathbb{E}[\|\nabla F(\tilde{\mathbf{x}}^{s-1})\|^2]. \end{aligned}$$

Multiplying both sides by 2 completes the proof.

## D.2 Proof of Theorem 3

We will only analyze case 1 where Assumptions 1 – 3 hold. The other case where Assumptions 1 and 4 are true can be analyzed in the same manner.

For analysis, let sequence  $\{0, t_1, t_2, \dots, t_N\}$ , be the iteration indices where  $B_{t_i} = 1$  (0 is automatically contained since at the beginning of L2S-SC,  $\mathbf{v}_0$  is calculated). For a given sequence  $\{0, t_1, t_2, \dots, t_S\}$ , it can be seen that due to the step

back in Line 7 of Alg. 3,  $\mathbf{x}_{t_i-1}$  plays the role of the starting point of an inner loop of SARAH; while  $\mathbf{x}_{t_{i+1}-1}$  is analogous to  $\mathbf{x}_m^s$  of SARAH's inner loop. Define  $\mathbf{x}_{-1} = \mathbf{x}_0$  and

$$\lambda_{i+1} := \left\{ \frac{2\eta L}{2 - \eta L} + (2 + 2\eta L) \left[ 1 - \left( \frac{2}{\eta L} - 1 \right) \mu^2 \eta^2 \right]^{t_{i+1} - t_i} \right\}. \quad (22)$$

Using similar arguments of Lemma 6, when  $\eta \leq 2/(3L)$ , it is guaranteed to have

$$\begin{aligned} \mathbb{E}[\|\nabla F(\mathbf{x}_{t_S-1})\|^2 | \{0, t_1, t_2, \dots, t_S\}] &\leq \lambda_S \mathbb{E}[\|\nabla F(\mathbf{x}_{t_S-1})\|^2 | \{0, t_1, t_2, \dots, t_S\}] \\ &= \lambda_S \mathbb{E}[\|\nabla F(\mathbf{x}_{t_S-1-1})\|^2 | \{0, t_1, t_2, \dots, t_S\}] \\ &\leq \lambda_S \lambda_{S-1} \dots \lambda_1 \|\nabla F(\mathbf{x}_0)\|^2. \end{aligned} \quad (23)$$

For convenience, let us define

$$\theta := 1 - \left( \frac{2}{\eta L} - 1 \right) \mu^2 \eta^2.$$

Note that choosing  $\eta$  properly we can have  $\theta < 1$ . Now it can be seen that

$$\mathbb{E}[\theta^{t_{i+1} - t_i} | t_i] \leq \sum_{j=1}^{\infty} \frac{1}{m} \left( 1 - \frac{1}{m} \right)^{j-1} \theta^j \leq \frac{1}{m-1} \frac{\theta(1 - \frac{1}{m})}{1 - \theta(1 - \frac{1}{m})}.$$

Note that this inequality is irrelevant with  $t_i$ . Thus if we further take expectation w.r.t.  $t_i$ , we arrive at

$$\mathbb{E}[\theta^{t_{i+1} - t_i}] \leq \frac{1}{m-1} \frac{\theta(1 - \frac{1}{m})}{1 - \theta(1 - \frac{1}{m})}. \quad (24)$$

Plugging (24) into (22) we have

$$\mathbb{E}[\lambda_i] \leq \frac{2\eta L}{2 - \eta L} + \frac{2 + 2\eta L}{m-1} \frac{\theta(1 - \frac{1}{m})}{1 - \theta(1 - \frac{1}{m})} := \lambda, \forall i.$$

Note that the randomness of  $\lambda_{i+1}$  comes from  $t_{i+1} - t_i$ , which is the length of the interval between the calculation of two snapshot gradient. Since  $\mathbb{P}\{t_{i+1} - t_i = u, t_{i+2} - t_{i+1} = v\} = \mathbb{P}\{t_{i+1} - t_i = u\} \mathbb{P}\{t_{i+2} - t_{i+1} = v\}$  for positive integers  $u$  and  $v$ , it can be seen  $\{t_{i+1} - t_i\}$  are mutually independent, which further leads to the mutual independence of  $\lambda_1, \lambda_2, \dots, \lambda_S$ . Therefore, taking expectation w.r.t.  $\{0, t_1, t_2, \dots, t_S\}$  on both sides of (23), we have

$$\mathbb{E}[\|\nabla F(\mathbf{x}_{t_S-1})\|^2] = \mathbb{E}[\lambda_S \lambda_{S-1} \dots \lambda_1] \|\nabla F(\mathbf{x}_0)\|^2 \leq \lambda^S \|\nabla F(\mathbf{x}_0)\|^2$$

which completes the proof.

### D.3 When to Use An $n$ -dependent Step Size in Convex Problems

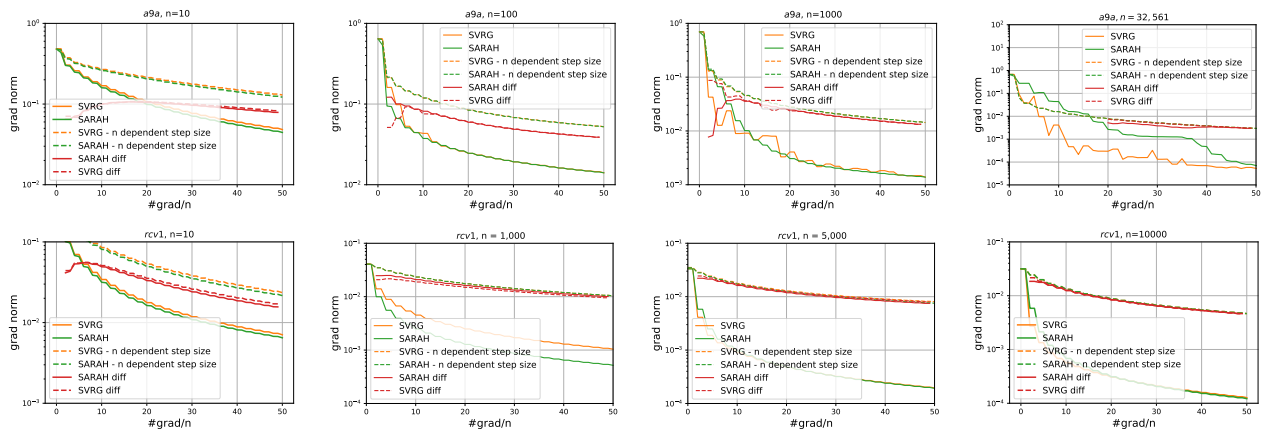

Figure 4: Performances of  $n$ -dependent step size and  $n$ -independent step size under on subsample datasets *rcv1* and *a9a*.



We perform SVRG and SARAH with  $n$ -dependent/independent step sizes to solve logistic regression problems on subsampled *rcv1* and *a9a*. The results can be found in Fig. 4. It can be seen that  $n$ -independent step sizes perform better than those of  $n$ -dependent step sizes in all the tests. In addition, as  $n$  increases, i) the gradient norm of solutions obtained via  $n$ -dependent step sizes becomes smaller; and ii) the performance gap between  $n$ -dependent and  $n$ -independent step sizes reduces. These observations suggest  $n$ -dependent step sizes can reveal their merits when  $n$  is extremely large (at least it should be larger than the size of *a9a*, which is  $n = 32561$ ).

## E Boosting the Practical Merits of SARAH

---

### Algorithm 5 D2S

---

```

1: Initialize:  $\tilde{\mathbf{x}}_0, \eta, m, S$ 
2: for  $s = 1, 2, \dots, S$  do
3:    $\mathbf{x}_0^s = \tilde{\mathbf{x}}^{s-1}$ 
4:    $\mathbf{v}_0^s = \nabla F(\mathbf{x}_0^s)$ 
5:    $\mathbf{x}_1^s = \mathbf{x}_0^s - \eta \mathbf{v}_0^s$ 
6:   for  $t = 1, 2, \dots, m$  do
7:     Sample  $i_t$  according to  $\mathbf{p}_t^s$  in (26)
8:     Compute  $\mathbf{v}_t^s$  via (27)
9:      $\mathbf{x}_{t+1}^s = \mathbf{x}_t^s - \eta \mathbf{v}_t^s$ 
10:  end for
11:   $\tilde{\mathbf{x}}^s$  uniformly rnd. chosen from  $\{\mathbf{x}_t^s\}_{t=0}^m$ 
12: end for
13: Output:  $\tilde{\mathbf{x}}^S$ 

```

---

**Assumption 5.** Each  $f_i : \mathbb{R}^d \rightarrow \mathbb{R}$  has  $L_i$ -Lipchitz gradient, and  $F$  has  $L_F$ -Lipchitz gradient; that is,  $\|\nabla f_i(\mathbf{x}) - \nabla f_i(\mathbf{y})\| \leq L_i \|\mathbf{x} - \mathbf{y}\|$ , and  $\|\nabla F(\mathbf{x}) - \nabla F(\mathbf{y})\| \leq L_F \|\mathbf{x} - \mathbf{y}\|, \forall \mathbf{x}, \mathbf{y} \in \mathbb{R}^d$ .

This section presents a simple yet effective variant of SARAH to enable a larger step size. The improvement stems from making use of the data dependent  $L_i$  in Assumption 5. The resultant algorithm that we term **Data Dependent SARAH (D2S)** is summarized in Alg. 5. For simplicity D2S is developed based on SARAH, but it generalizes to L2S as well.

Intuitively, each  $f_i$  provides a distinct gradient to be used in the updates. The insight here is that if one could quantify the ‘‘importance’’ of  $f_i$  (or the gradient it provides), those more important ones should be used more frequently. Formally, our idea is to draw  $i_t$  of outer loop  $s$  according to a probability mass vector  $\mathbf{p}_t^s \in \Delta_n$ , where  $\Delta_n := \{\mathbf{p} \in \mathbb{R}_+^n \mid \langle \mathbf{1}, \mathbf{p} \rangle = 1\}$ . With  $\mathbf{p}_t^s = \mathbf{1}/n$ , D2S boils down to SARAH.

Ideally, finding  $\mathbf{p}_t^s$  should rely on the estimation error as optimality criterion. Specifically, we wish to minimize  $\mathbb{E}[\|\mathbf{v}_t^s - \nabla F(\mathbf{x}_t^s)\|^2 \mid \mathcal{F}_{t-1}]$  in Lemma 1. Writing the expectation explicitly, the problem can be posed as

$$\min_{\mathbf{p}_t^s \in \Delta_n} \frac{1}{n^2} \sum_{i \in [n]} \frac{\|\nabla f_i(\mathbf{x}_t^s) - \nabla f_i(\mathbf{x}_{t-1}^s)\|^2}{p_{t,i}^s} \Rightarrow (p_{t,i}^s)^* = \frac{\|\nabla f_i(\mathbf{x}_t^s) - \nabla f_i(\mathbf{x}_{t-1}^s)\|}{\sum_{j \in [n]} \|\nabla f_j(\mathbf{x}_t^s) - \nabla f_j(\mathbf{x}_{t-1}^s)\|} \quad (25)$$

where the  $(p_{t,i}^s)^*$  denotes the optimal solution. Though finding out  $\mathbf{p}_t^s$  via (25) is optimal, it is intractable to implement because  $\nabla f_i(\mathbf{x}_{t-1}^s)$  and  $\nabla f_i(\mathbf{x}_t^s)$  for all  $i \in [n]$  must be computed, which is even more expensive than computing  $\nabla F(\mathbf{x}_t^s)$  itself. However, (25) implies that a larger probability should be assigned to those  $\{f_i\}$  whose gradients on  $\mathbf{x}_t^s$  and  $\mathbf{x}_{t-1}^s$  change drastically. The intuition behind this observation is that a more abrupt change of the gradient suggests a larger residual to be optimized. Thus,  $\|\nabla f_i(\mathbf{x}_t^s) - \nabla f_i(\mathbf{x}_{t-1}^s)\|^2$  in (25) can be approximated by its upper bound  $L_i^2 \|\mathbf{x}_t^s - \mathbf{x}_{t-1}^s\|^2$ , which inaccurately captures gradient changes. The resultant problem and its optimal solution are

$$\min_{\mathbf{p}_t^s \in \Delta_n} \frac{1}{n^2} \sum_{i \in [n]} \frac{L_i^2 \|\mathbf{x}_t^s - \mathbf{x}_{t-1}^s\|^2}{p_{t,i}^s} \Rightarrow (p_{t,i}^s)^* = \frac{L_i}{\sum_{j \in [n]} L_j}, \forall t, \forall s. \quad (26)$$

Choosing  $\mathbf{p}_t^s$  according to (26) is computationally attractive not only because it eliminates the need to compute gradients, but also because  $L_i$  is usually cheap to obtain in practice (at least for linear and logistic regression losses). Knowing

$L = \max_{i \in [n]} L_i$  is critical for SARAH [Nguyen et al., 2017]; hence, finding  $\mathbf{p}_t^s$  only introduces negligible overhead compared to SARAH. Accounting for  $\mathbf{p}_t^s$ , the gradient estimator  $\mathbf{v}_t^s$  is also modified to an importance sampling based one to compensate for those less frequently sampled  $\{f_i\}$

$$\mathbf{v}_t^s = \frac{\nabla f_{i_t}(\mathbf{x}_t^s) - \nabla f_{i_t}(\mathbf{x}_{t-1}^s)}{np_{t,i_t}^s} + \mathbf{v}_{t-1}^s. \quad (27)$$

Note that  $\mathbf{v}_t^s$  is still biased, since  $\mathbb{E}[\mathbf{v}_t^s | \mathcal{F}_{t-1}] = \nabla F(\mathbf{x}_t^s) - \nabla F(\mathbf{x}_{t-1}^s) + \mathbf{v}_{t-1}^s \neq \nabla F(\mathbf{x}_t^s)$ . As asserted next, with  $\mathbf{p}_t^s$  as in (26) and  $\mathbf{v}_t^s$  computed via (27), D2S indeed improves SARAH's convergence rate.

**Theorem 4.** *If Assumptions 5, 2, and 3 hold, upon choosing  $\eta < 1/\bar{L}$  and a large enough  $m$  such that  $\sigma_m := \frac{1}{\mu\eta(m+1)} + \frac{\eta\bar{L}}{2-\eta\bar{L}} < 1$ , D2S converges linearly; that is,*

$$\mathbb{E}[\|\nabla F(\tilde{\mathbf{x}}_s)\|^2] \leq (\sigma_m)^s \|\nabla F(\tilde{\mathbf{x}}_0)\|^2, \forall s.$$

Compared with SARAH's linear convergence rate  $\tilde{\sigma}_m = \frac{1}{\mu\eta(m+1)} + \frac{\eta\bar{L}}{2-\eta\bar{L}}$  [Nguyen et al., 2017], the improvement on the convergence constant  $\sigma_m$  is twofold: i) if  $\eta$  and  $m$  are chosen the same in D2S and SARAH, it always holds that  $\sigma_m \leq \tilde{\sigma}_m$ , which implies D2S converges faster than SARAH; and ii) the step size can be chosen more aggressively with  $\eta < 1/\bar{L}$ , while the standard SARAH step size has to be less than  $1/L$ . The improvements are further corroborated in terms of the number of IFO calls, especially for ERM problems that are ill-conditioned.

**Corollary 7.** *If Assumptions 5, 2, and 3 hold, to find  $\tilde{\mathbf{x}}^s$  such that  $\mathbb{E}[\|\nabla F(\tilde{\mathbf{x}}^s)\|^2] \leq \epsilon$ , D2S requires  $\mathcal{O}((n + \bar{\kappa}) \ln(1/\epsilon))$  IFO calls, where  $\bar{\kappa} := \bar{L}/\mu$ .*

### E.1 Optimal Solution of (25)

The optimal solution of (25) can be directly obtained from the partial Lagrangian

$$\mathcal{L}(\mathbf{p}_t^s, \lambda) = \frac{1}{n^2} \sum_{i \in [n]} \frac{\|\nabla f_i(\mathbf{x}_t^s) - \nabla f_i(\mathbf{x}_{t-1}^s)\|^2}{p_{t,i}^s} + \lambda \sum_{i \in [n]} p_{t,i}^s - \lambda.$$

Taking derivative w.r.t.  $\mathbf{p}_t^s$  and set it to  $\mathbf{0}$ , we have

$$p_{t,i}^s = \frac{\|\nabla f_i(\mathbf{x}_t^s) - \nabla f_i(\mathbf{x}_{t-1}^s)\|}{\sqrt{\lambda n}}.$$

Note that if  $\lambda > 0$ , it automatically satisfies  $p_{t,i}^s \geq 0$ . Then let  $\sum_{i \in [n]} p_{t,i}^s = 1$ , it is not hard to find the value of  $\lambda$  and obtain (25). The solution of (26) can be derived in a similar manner.

### E.2 Proof of Theorem 4

The proof generalizes the original proof of SARAH for strongly convex problems [Nguyen et al., 2017, Theorem 2]. Notice that the importance sampling based gradient estimator enables the fact  $\mathbb{E}_{i_t}[\mathbf{v}_t^s | \mathcal{F}_{t-1}] = \nabla F(\mathbf{x}_t^s) - \nabla F(\mathbf{x}_{t-1}^s) + \mathbf{v}_{t-1}^s$ . By exploring this fact, it is not hard to see that the following lemmas hold. The proof has almost the same steps as those in [Nguyen et al., 2017], except for the expectation now is w.r.t. a nonuniform distribution  $\mathbf{p}_t^s$ .

**Lemma 12.** [Nguyen et al., 2017, Lemma 1] *In any outer loop  $s$ , if  $\eta \leq 1/L_F$ , we have*

$$\sum_{t=0}^m \mathbb{E}[\|\nabla F(\mathbf{x}_t^s)\|^2] \leq \frac{2}{\eta} \mathbb{E}[F(\mathbf{x}_0^s) - F(\mathbf{x}^*)] + \sum_{t=0}^m \mathbb{E}[\|\nabla F(\mathbf{x}_t^s) - \mathbf{v}_t^s\|^2].$$

**Lemma 13.** *The following equation is true*

$$\mathbb{E}[\|\nabla F(\mathbf{x}_t^s) - \mathbf{v}_t^s\|^2] = \sum_{\tau=1}^t \mathbb{E}[\|\mathbf{v}_\tau^s - \mathbf{v}_{\tau-1}^s\|^2] - \sum_{\tau=1}^t \mathbb{E}[\|\nabla F(\mathbf{x}_\tau^s) - \nabla F(\mathbf{x}_{\tau-1}^s)\|^2].$$

**Lemma 14.** *In any outer loop  $s$ , if  $\eta$  is chosen to satisfy  $1 - \frac{2}{\eta\bar{L}} < 0$ , we have*

$$\mathbb{E}[\|\mathbf{v}_t^s - \mathbf{v}_{t-1}^s\|^2 | \mathcal{F}_{t-1}] \leq \frac{\eta\bar{L}}{2 - \eta\bar{L}} \left( \|\mathbf{v}_{t-1}^s\|^2 - \mathbb{E}[\|\mathbf{v}_t^s\|^2 | \mathcal{F}_{t-1}] \right), \forall t \geq 1.$$

*Proof.* Consider that for any  $t \geq 1$

$$\begin{aligned}
 & \mathbb{E}_{i_t} [\|\mathbf{v}_t^s\|^2 | \mathcal{F}_{t-1}] = \mathbb{E}_{i_t} [\|\mathbf{v}_t^s - \mathbf{v}_{t-1}^s + \mathbf{v}_{t-1}^s\|^2 | \mathcal{F}_{t-1}] \\
 & = \|\mathbf{v}_{t-1}^s\|^2 + \mathbb{E} [\|\mathbf{v}_t^s - \mathbf{v}_{t-1}^s\|^2 | \mathcal{F}_{t-1}] + 2\mathbb{E} [\langle \mathbf{v}_{t-1}^s, \mathbf{v}_t^s - \mathbf{v}_{t-1}^s \rangle | \mathcal{F}_{t-1}] \\
 & \stackrel{(a)}{=} \|\mathbf{v}_{t-1}^s\|^2 + \mathbb{E} \left[ \|\mathbf{v}_t^s - \mathbf{v}_{t-1}^s\|^2 + \frac{2}{\eta} \left\langle \mathbf{x}_{t-1}^s - \mathbf{x}_t^s, \frac{\nabla f_{i_t}(\mathbf{x}_t^s) - \nabla f_{i_t}(\mathbf{x}_{t-1}^s)}{np_{t,i_t}^s} \right\rangle \middle| \mathcal{F}_{t-1} \right] \\
 & \stackrel{(b)}{\leq} \|\mathbf{v}_{t-1}^s\|^2 + \mathbb{E} \left[ \|\mathbf{v}_t^s - \mathbf{v}_{t-1}^s\|^2 - \frac{2}{\eta L_{i_t} np_{t,i_t}^s} \|\nabla f_{i_t}(\mathbf{x}_t^s) - \nabla f_{i_t}(\mathbf{x}_{t-1}^s)\|^2 \middle| \mathcal{F}_{t-1} \right] \\
 & \stackrel{(c)}{=} \|\mathbf{v}_{t-1}^s\|^2 + \mathbb{E} \left[ \|\mathbf{v}_t^s - \mathbf{v}_{t-1}^s\|^2 - \frac{2np_{t,i_t}^s}{\eta L_{i_t}} \|\mathbf{v}_t^s - \mathbf{v}_{t-1}^s\|^2 \middle| \mathcal{F}_{t-1} \right] \\
 & \stackrel{(d)}{=} \|\mathbf{v}_{t-1}^s\|^2 + \mathbb{E} \left[ \left(1 - \frac{2}{\eta \bar{L}}\right) \|\mathbf{v}_t^s - \mathbf{v}_{t-1}^s\|^2 \middle| \mathcal{F}_{t-1} \right]
 \end{aligned}$$

where (a) follows from (27) and the update  $\mathbf{x}_t^s = \mathbf{x}_{t-1}^s - \eta \mathbf{v}_t^s$ ; (b) is the result of (9c); (c) is by the definition of  $\mathbf{v}_t^s$ ; and (d) is by plugging (26) in. By choosing  $\eta$  such that  $1 - \frac{2}{\eta \bar{L}} < 0$ , we have

$$\mathbb{E} [\|\mathbf{v}_t^s - \mathbf{v}_{t-1}^s\|^2 | \mathcal{F}_{t-1}] \leq \frac{\eta \bar{L}}{2 - \eta \bar{L}} \left( \|\mathbf{v}_{t-1}^s\|^2 - \mathbb{E} [\|\mathbf{v}_t^s\|^2 | \mathcal{F}_{t-1}] \right)$$

which concludes the proof.  $\square$

**Proof of Theorem 4:** Using Lemmas 13 and 14 we have

$$\begin{aligned}
 \mathbb{E} [\|\nabla F(\mathbf{x}_t^s) - \mathbf{v}_t^s\|^2] & = \sum_{\tau=1}^t \mathbb{E} [\|\mathbf{v}_\tau^s - \mathbf{v}_{\tau-1}^s\|^2] - \sum_{\tau=1}^t \mathbb{E} [\|\nabla F(\mathbf{x}_\tau^s) - \nabla F(\mathbf{x}_{\tau-1}^s)\|^2] \\
 & \leq \frac{\eta \bar{L}}{2 - \eta \bar{L}} \mathbb{E} [\|\mathbf{v}_0^s\|^2].
 \end{aligned} \tag{28}$$

If we further let  $\eta \leq 1/L_F$ , plugging (28) into Lemma 12, we have

$$\sum_{t=0}^m \mathbb{E} [\|\nabla F(\mathbf{x}_t^s)\|^2] \leq \frac{2}{\eta} \mathbb{E} [F(\mathbf{x}_0^s) - F(\mathbf{x}^*)] + \frac{(m+1)\eta \bar{L}}{2 - \eta \bar{L}} \mathbb{E} [\|\mathbf{v}_0^s\|^2].$$

Since  $\tilde{\mathbf{x}}^s$  is uniformly randomized chosen from  $\{\mathbf{x}_t^s\}_{t=0}^m$ , by exploiting the fact  $\mathbf{v}_0^s = \nabla F(\tilde{\mathbf{x}}^{s-1})$  and  $\mathbf{x}_0^s = \tilde{\mathbf{x}}^{s-1}$ , we have that

$$\begin{aligned}
 \mathbb{E} [\|\nabla F(\tilde{\mathbf{x}}^s)\|^2] & \leq \frac{2}{\eta(m+1)} \mathbb{E} [F(\tilde{\mathbf{x}}^{s-1}) - F(\mathbf{x}^*)] + \frac{\eta \bar{L}}{2 - \eta \bar{L}} \mathbb{E} [\|\nabla F(\tilde{\mathbf{x}}^{s-1})\|^2] \\
 & \leq \left( \frac{2}{\mu \eta(m+1)} + \frac{\eta \bar{L}}{2 - \eta \bar{L}} \right) \mathbb{E} [\|\nabla F(\tilde{\mathbf{x}}^{s-1})\|^2]
 \end{aligned} \tag{29}$$

where the last inequality follows from (10a). Unrolling  $\mathbb{E} [\|\nabla F(\tilde{\mathbf{x}}^{s-1})\|^2]$  in (29), Theorem 4 can be proved.

### E.3 Proof of Corollary 7

The proof is modified from [Nguyen et al., 2017, Corollary 3]. By choosing  $\eta = 0.5/(\bar{L})$  and  $m = 4.5\bar{\kappa}$ , we have  $\sigma_m$  in Theorem 4 bounded by

$$\sigma_m = \frac{1}{\frac{1}{2\bar{\kappa}}(4.5\bar{\kappa} + 1)} + \frac{0.5}{1.5} < \frac{7}{9}.$$

Then by Theorem 4, by choosing  $S$  as

$$S \geq \frac{\ln(\|\nabla F(\tilde{\mathbf{x}}^0)\|^2/\epsilon)}{\ln(9/7)} \geq \log_{7/9}(\|\nabla F(\tilde{\mathbf{x}}^0)\|^2/\epsilon)$$

we have  $\mathbb{E} [\|\nabla F(\tilde{\mathbf{x}}^S)\|^2] \leq (\sigma_m)^2 \|\nabla F(\tilde{\mathbf{x}}^0)\|^2 \leq \epsilon$ . Thus the number of IFO calls is

$$(n + 2m)S = \mathcal{O}((n + \bar{\kappa}) \ln(1/\epsilon)).$$

**Table 1:** A summary of datasets used in numerical tests

| Dataset     | $d$    | $n$ (train) | density | $n$ (test) | $L$    | $\lambda$ |
|-------------|--------|-------------|---------|------------|--------|-----------|
| <i>a9a</i>  | 123    | 32,561      | 11.28%  | 16,281     | 3.4672 | 0.0005    |
| <i>rcv1</i> | 47,236 | 20,242      | 0.157%  | 677,399    | 0.25   | 0.0001    |
| <i>w7a</i>  | 300    | 24,692      | 3.89%   | 25,057     | 2.917  | 0.005     |

## F Numerical Experiments

Experiments for (strongly) convex cases are performed using python 3.7 on an Intel i7-4790CPU @3.60 GHz (32 GB RAM) desktop. The details of the used datasets are summarized in Table 1. The smoothness parameter  $L_i$  can be calculated via  $L_i = \|\mathbf{a}_i\|^2/4$  by checking the Hessian matrix.

**L2S.** Since we are considering the convex case, we set  $\lambda = 0$  in (8). SVRG, SARAH and SGD are chosen as benchmarks, where SGD is modified with step size  $\eta_k = 1/(\bar{L}(k+1))$  on the  $k$ -th epoch. For both SARAH and SVRG, the length of inner loop is chosen as  $m = n$ . For a fair comparison, we use the same  $m$  for L2S [cf. (3)]. The step sizes of SARAH and SVRG are selected from  $\{0.01/\bar{L}, 0.1/\bar{L}, 0.2/\bar{L}, 0.3/\bar{L}, 0.4/\bar{L}, 0.5/\bar{L}, 0.6/\bar{L}, 0.7/\bar{L}, 0.8/\bar{L}, 0.9/\bar{L}, 0.95/\bar{L}\}$  and those with best performances are reported. Note that the SVRG theory only effects when  $\eta < 0.25/\bar{L}$ . The step size of L2S is the same as that of SARAH for fairness.

**L2S-SC.** The parameters are chosen in the same manner as the test of L2S.

**L2S for on Nonconvex Problems** We perform classification on MNIST dataset using a  $784 \times 128 \times 10$  feedforward neural network through Pytorch. The activation function used in hidden layer is sigmoid. SGD, SVRG, and SARAH are adopted as benchmarks. In all tested algorithms the batch sizes are  $b = 32$ . The step size of SGD is  $\mathcal{O}(\sqrt{b}/(k+1))$ , where  $k$  is the index of epoch; the step size is chosen as  $b/(Ln^{2/3})$  for SVRG [Reddi et al., 2016a]; and the step sizes are  $\sqrt{b}/(2\sqrt{n}L)$  for SARAH [Nguyen et al., 2019] and L2S. The inner loop lengths are selected to be  $m = n/b$  for SVRG and SARAH, while the same  $m$  is used for L2S.
